# Supplementary material for: A multimodel evaluation of the potential impact of shipping on particle species in the Mediterranean Sea
Source: Copernicus journal article supplement (doi:10.5194/acp-23-10163-2023), 2023-09-12
Supplement: Supplementary file 1 [file acp-23-10163-2023-supplement.pdf]

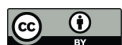

*Supplement of*

## **A multimodel evaluation of the potential impact of shipping on particle species in the Mediterranean Sea**

**Lea Fink et al.**

*Correspondence to:* Lea Fink (lea.fink@hereon.de)

The copyright of individual parts of the supplement might differ from the article licence.

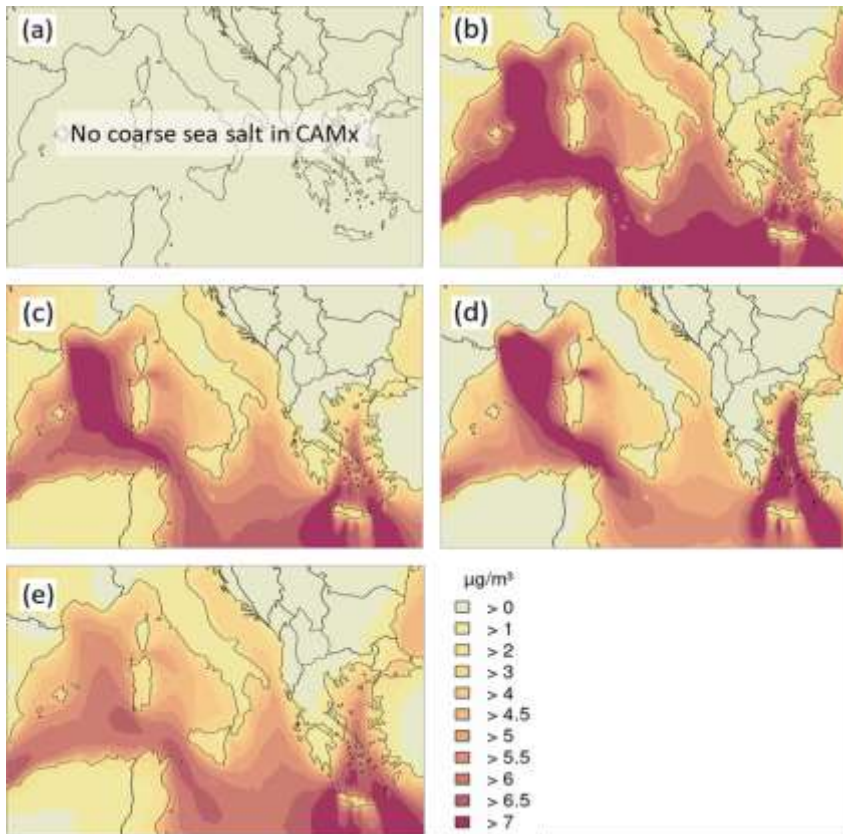

**Figure S1: Annual mean sea salt (NaCl) total concentration. (a) = CAMx, (b) = CHIMERE, (c) = CMAQ, (d) = EMEP, (e) = LOTOS-EUROS.**

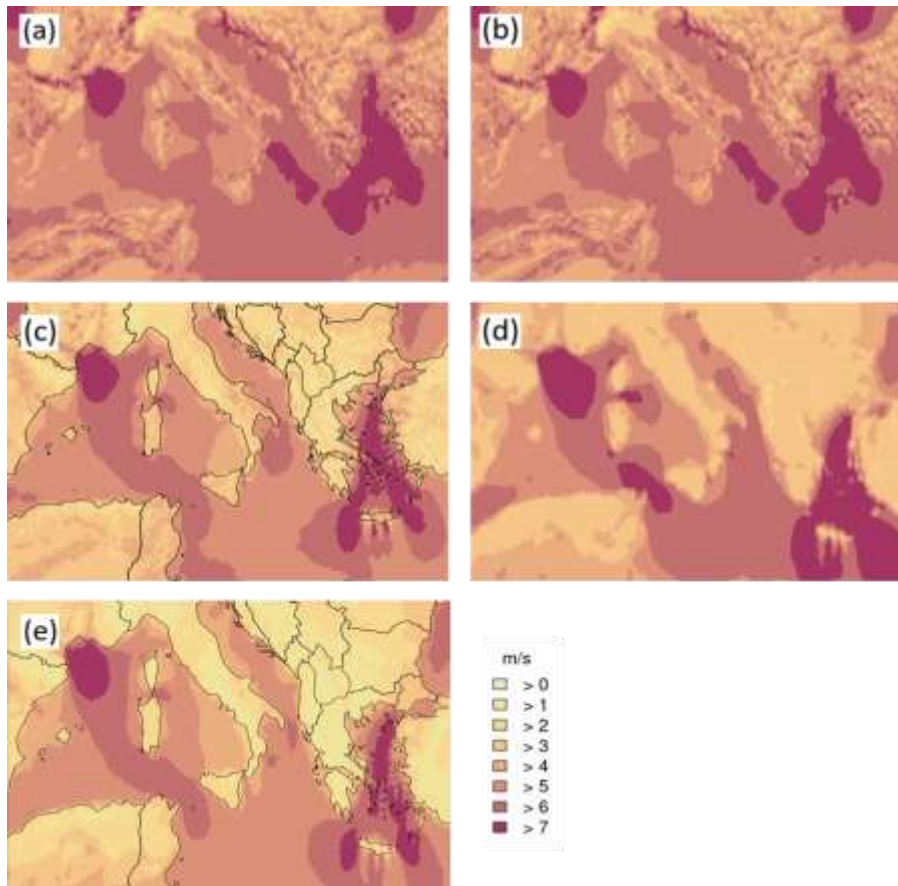

**Figure S2: Annual mean wind speed (m/s). (a) = CAMx, (b) = CHIMERE, (c) = CMAQ, (d) = EMEP, (e) = LOTOS-EUROS.**

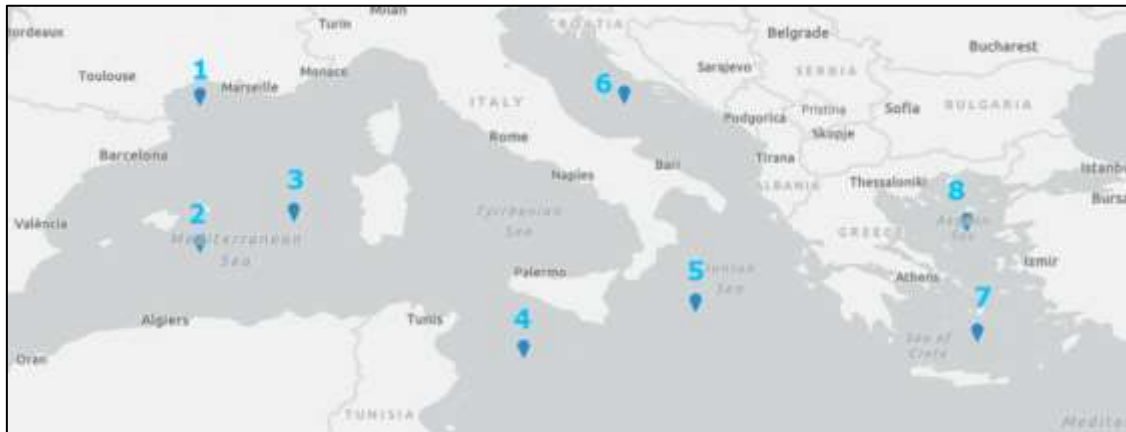

Figure S3: Overview of points the wind speed and sea salt correlation was tested was compared, latitude and longitude values are in table S1. Map source: ArcGIS Pro 2.7.1 © 2020 Esri Inc.

Table S1: Latitudes, longitudes, and correlation at these points based on hourly values in CMAQ, EMEP and LOTOS-EUROS and daily values in CHIMERE.

| ID | latitude  | longitude | Correlation (r) wind speed and sea salt |      |      |             |
|----|-----------|-----------|-----------------------------------------|------|------|-------------|
|    |           |           | CHIMERE                                 | CMAQ | EMEP | LOTOS-EUROS |
| 1  | 42.778684 | 4.00158   | 0.59                                    | 0.72 | 0.48 | 0.62        |
| 2  | 38.663892 | 4.00158   | 0.72                                    | 0.72 | 0.53 | 0.62        |
| 3  | 39.549332 | 6.587002  | 0.75                                    | 0.79 | 0.59 | 0.67        |
| 4  | 35.720838 | 12.907362 | 0.7                                     | 0.78 | 0.58 | 0.7         |
| 5  | 37.014137 | 17.641123 | 0.67                                    | 0.77 | 0.60 | 0.66        |
| 6  | 42.832907 | 15.678871 | 0.62                                    | 0.75 | 0.55 | 0.64        |
| 7  | 36.179274 | 25.391863 | 0.34                                    | 0.71 | 0.48 | 0.57        |
| 8  | 39.267262 | 25.102001 | 0.31                                    | 0.78 | 0.60 | 0.71        |

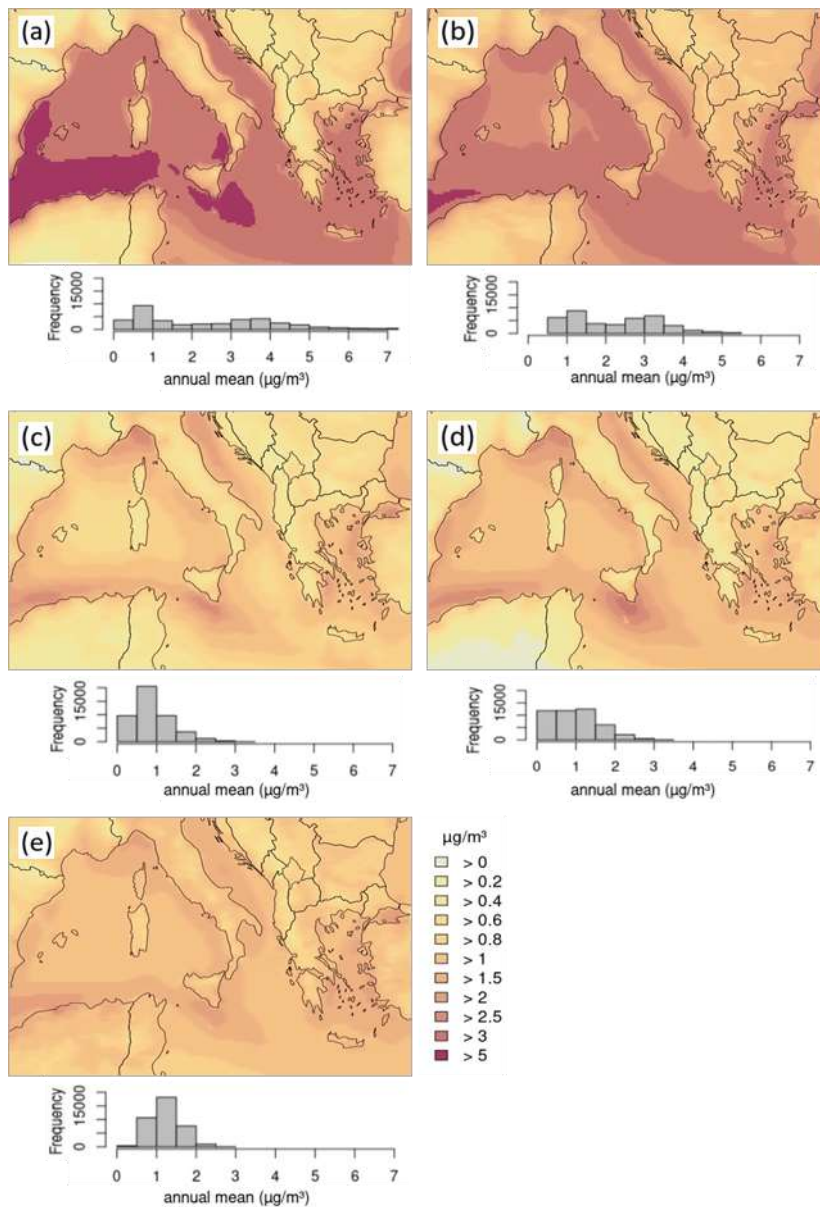

**Figure S4: Annual mean  $\text{HNO}_3$  total concentration. (a) = CAMx, (b) = CHIMERE, (c) = CMAQ, (d) = EMEP, (e) = LOTOS-EUROS. Below the domain figure is the respective frequency distribution displayed for the annual mean  $\text{HNO}_3$  concentration, referred to the whole model domain.**

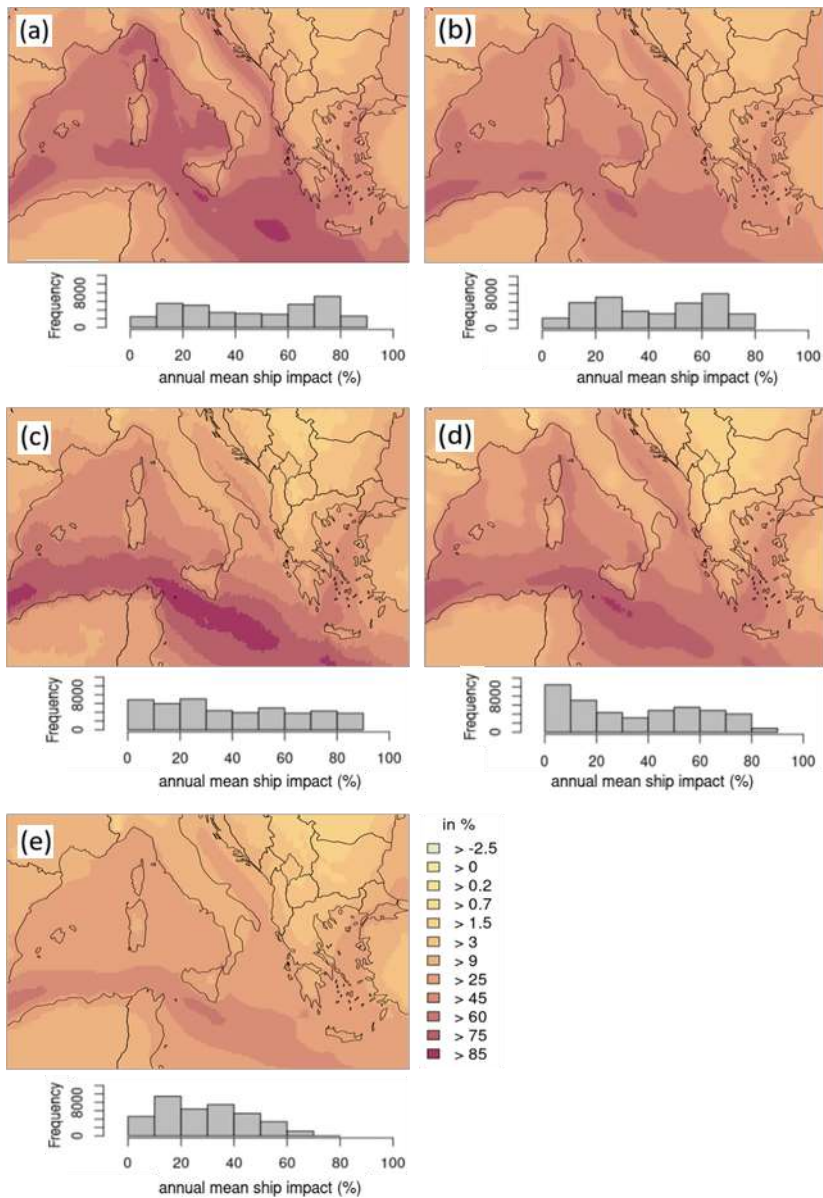

**Figure S5: Annual mean  $\text{HNO}_3$  relative potential ship impact. (a) = CAMx, (b) = CHIMERE, (c) = CMAQ, (d) = EMEP, (e) = LOTOS-EUROS. Below the domain figure is the respective frequency distribution displayed for the annual mean  $\text{HNO}_3$  potential ship impact, referred to the whole model domain.**



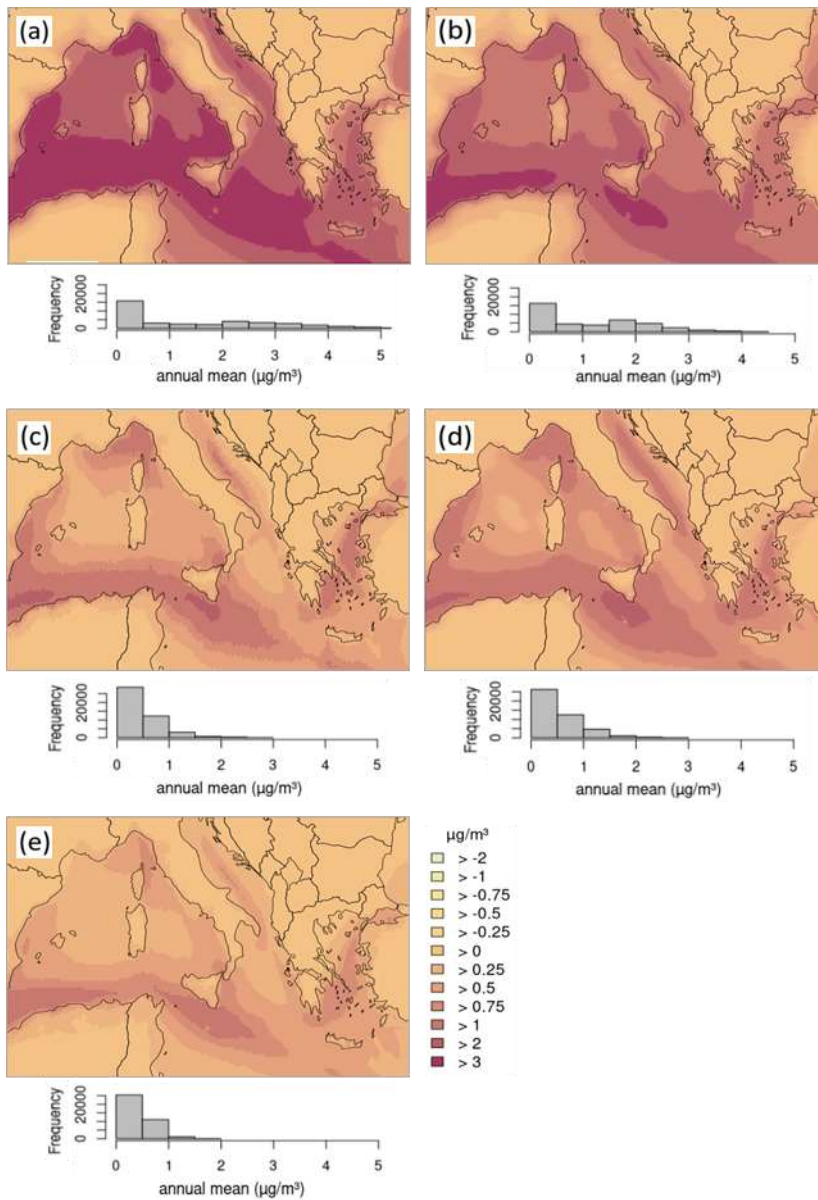

**Figure S6: Annual mean  $\text{HNO}_3$  absolute potential ship impact. (a) = CAMx, (b) = CHIMERE, (c) = CMAQ, (d) = EMEP, (e) = LOTOS-EUROS. Below the domain figure is the respective frequency distribution displayed for the annual mean  $\text{HNO}_3$  potential ship impact, referred to the whole model domain.**

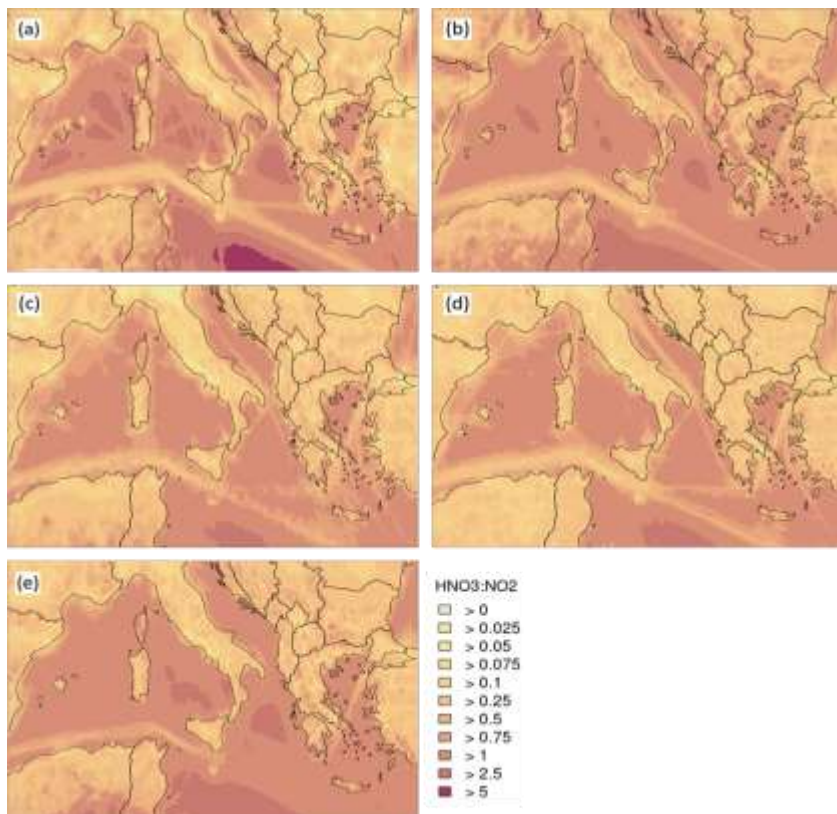

**Figure S7: Annual mean ratio of  $\text{HNO}_3:\text{NO}_2$  for emisbase run with all emission sources, based on averaged daily values. (a) = CAMx, (b) = CHIMERE, (c) = CMAQ, (d) = EMEP, (e) = LOTOS-EUROS.**



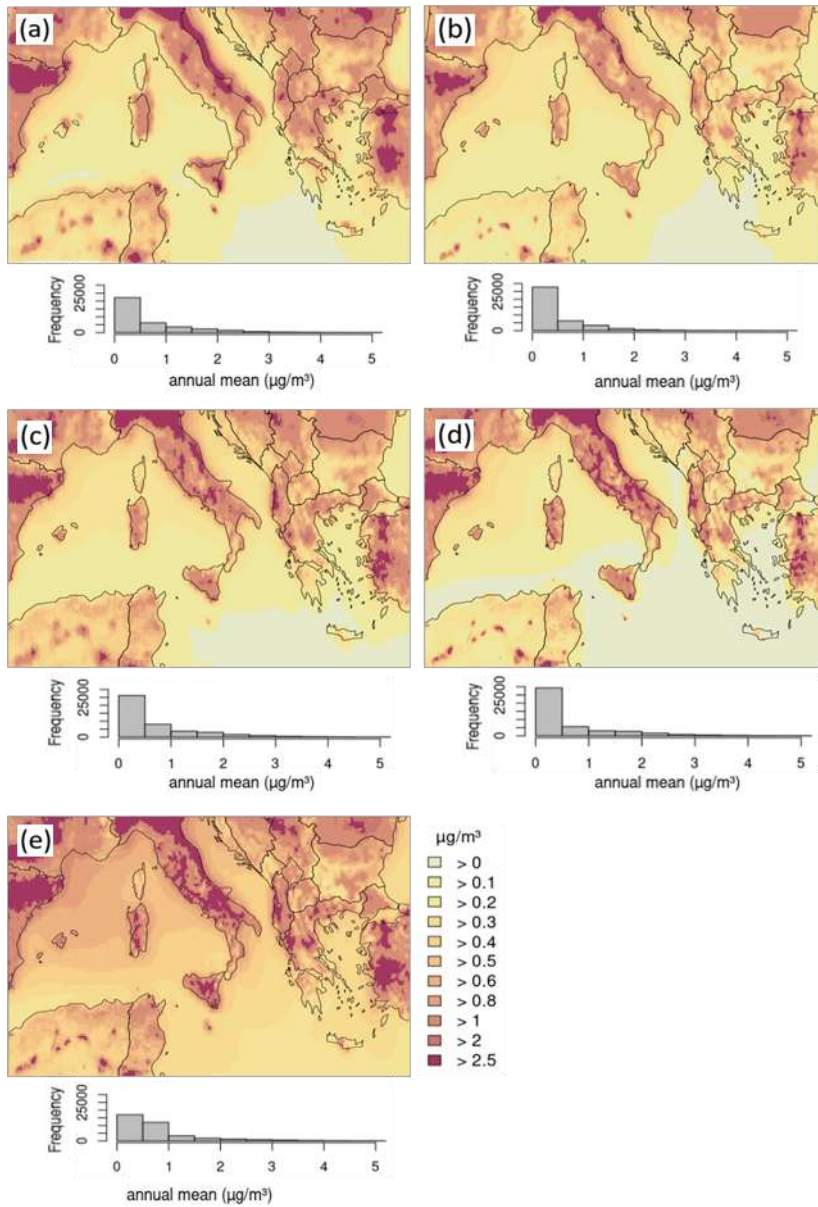

**Figure S8: Annual mean  $\text{NH}_3$  total concentration. (a) = CAMx, (b) = CHIMERE, (c) = CMAQ, (d) = EMEP, (e) = LOTOS-EUROS. Below the domain figure is the respective frequency distribution displayed for the annual mean  $\text{NH}_3$  concentration, referred to the whole model domain.**

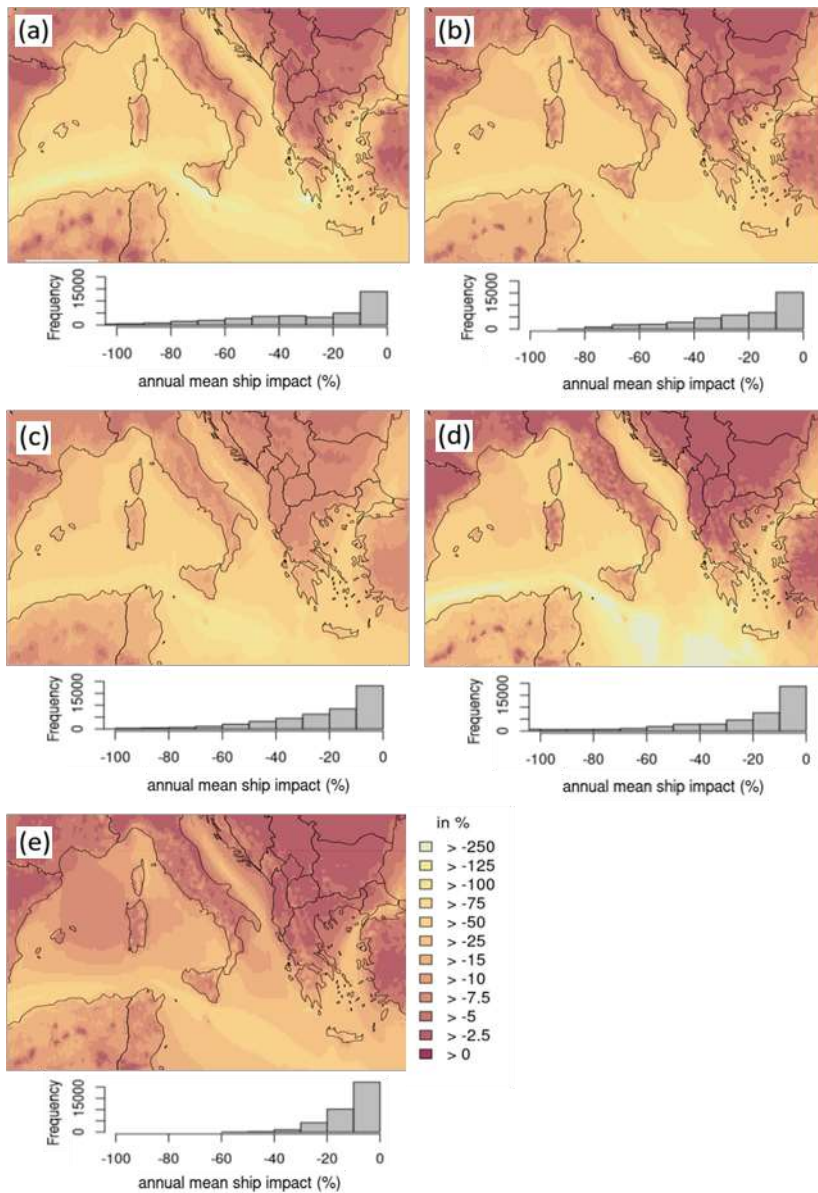

**Figure S9: Annual mean  $\text{NH}_3$  relative potential ship impact. (a) = CAMx, (b) = CHIMERE, (c) = CMAQ, (d) = EMEP, (e) = LOTOS-EUROS. Below the domain figure is the respective frequency distribution displayed for the annual mean  $\text{NH}_3$  potential ship impact, referred to the whole model domain.**

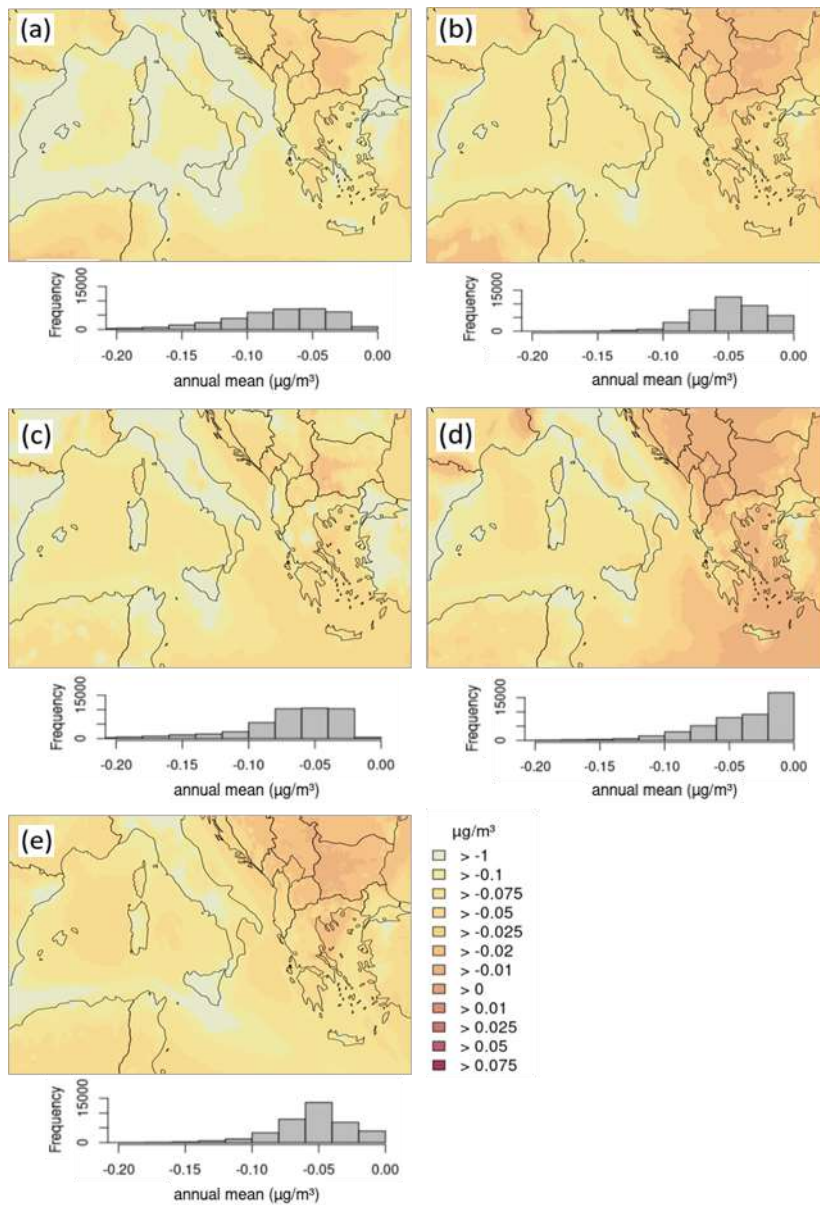

**Figure S10: Annual mean  $\text{NH}_3$  absolute potential ship impact. (a) = CAMx, (b) = CHIMERE, (c) = CMAQ, (d) = EMEP, (e) = LOTOS-EUROS. Below the domain figure is the respective frequency distribution displayed for the annual mean  $\text{NH}_3$  potential ship impact, referred to the whole model domain.**

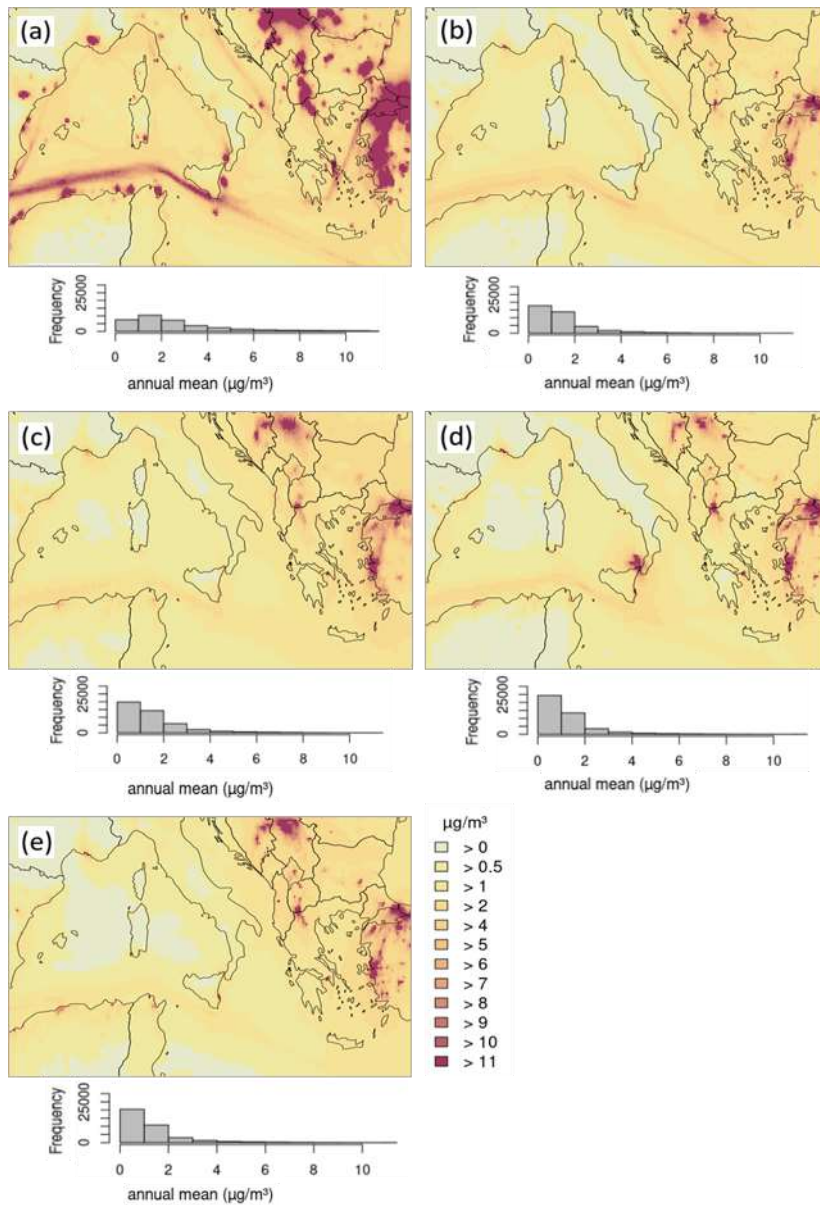

**Figure S11: Annual mean SO<sub>2</sub> total concentration. (a) = CAMx, (b) = CHIMERE, (c) = CMAQ, (d) = EMEP, (e) = LOTOS-EUROS. Below the domain figure is the respective frequency distribution displayed for the annual mean SO<sub>2</sub> concentration, referred to the whole model domain.**



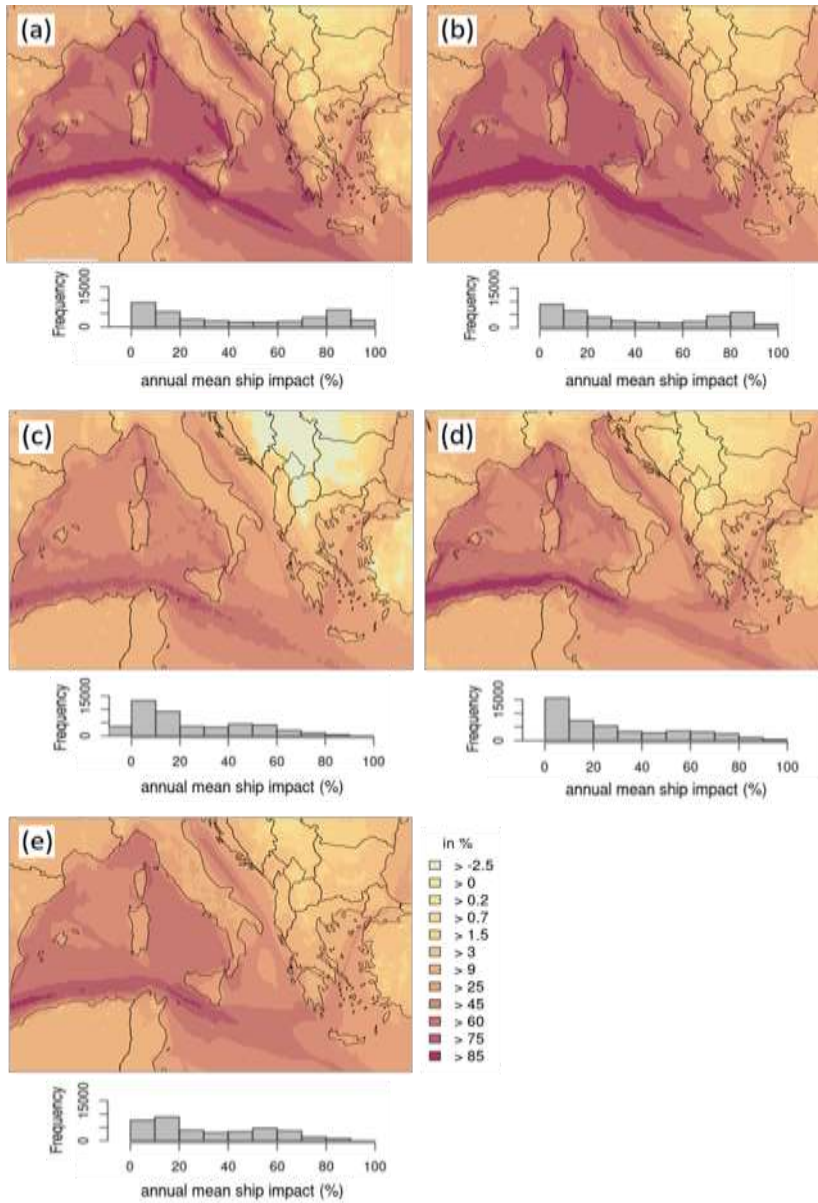

**Figure S12: Annual mean SO<sub>2</sub> relative potential ship impact. (a) = CAMx, (b) = CHIMERE, (c) = CMAQ, (d) = EMEP, (e) = LOTOS-EUROS. Below the domain figure is the respective frequency distribution displayed for the annual mean SO<sub>2</sub> potential ship impact, referred to the whole model domain.**

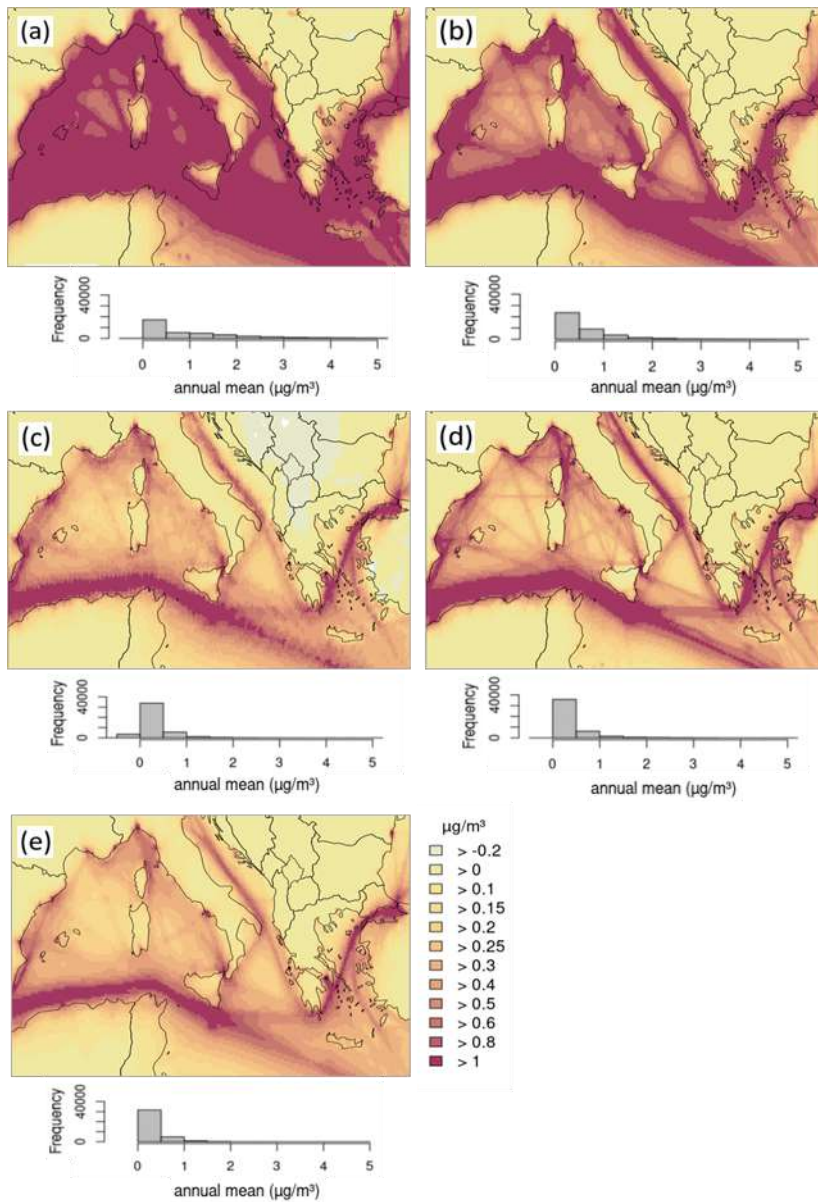

**Figure S13: Annual mean SO<sub>2</sub> absolute potential ship impact. (a) = CAMx, (b) = CHIMERE, (c) = CMAQ, (d) = EMEP, (e) = LOTOS-EUROS. Below the domain figure is the respective frequency distribution displayed for the annual mean SO<sub>2</sub> potential ship impact, referred to the whole model domain.**



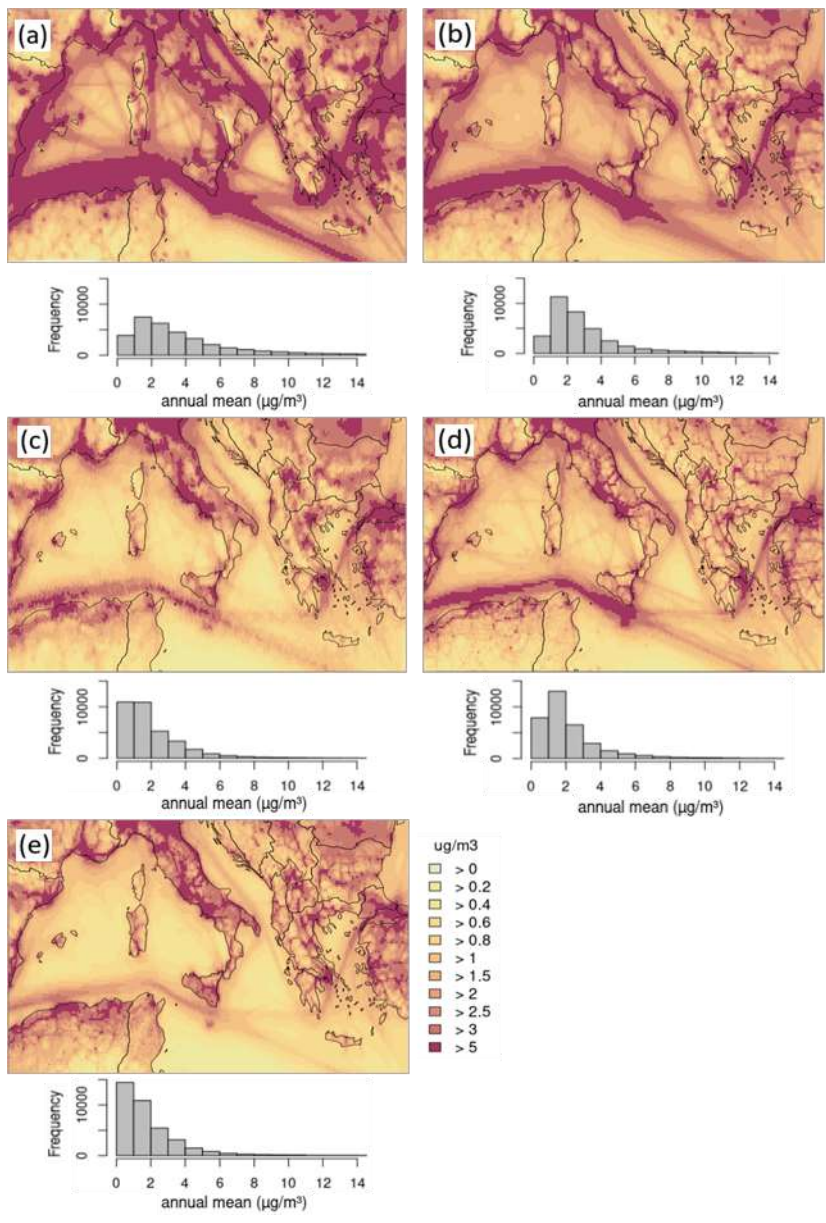

**Figure S14: Annual mean NO<sub>2</sub> total concentration. (a) = CAMx, (b) = CHIMERE, (c) = CMAQ, (d) = EMEP, (e) = LOTOS-EUROS. Below the domain figure is the respective frequency distribution displayed for the annual mean SO<sub>2</sub> concentration, referred to the whole model domain.**

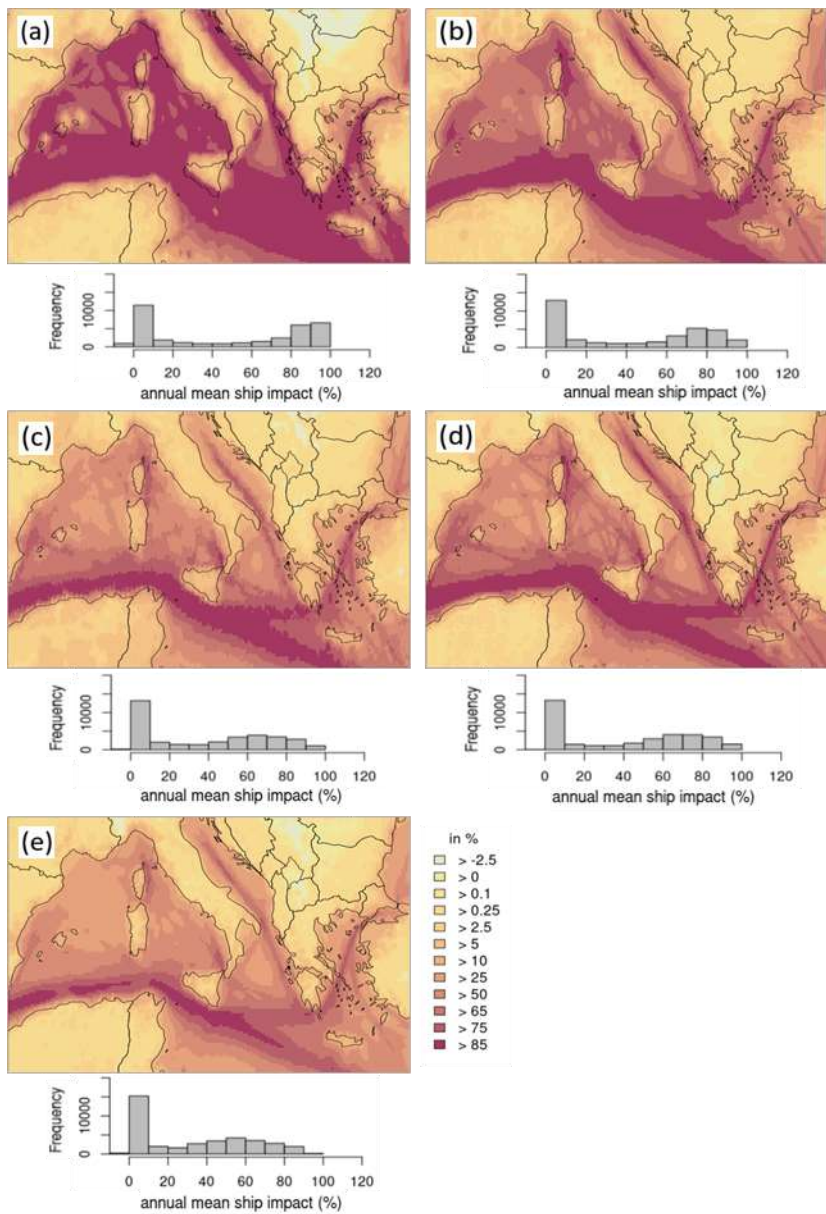

**Figure S15: Annual mean NO<sub>2</sub> relative potential ship impact. (a) = CAMx, (b) = CHIMERE, (c) = CMAQ, (d) = EMEP, (e) = LOTOS-EUROS. Below the domain figure is the respective frequency distribution displayed for the annual mean SO<sub>2</sub> potential ship impact, referred to the whole model domain.**

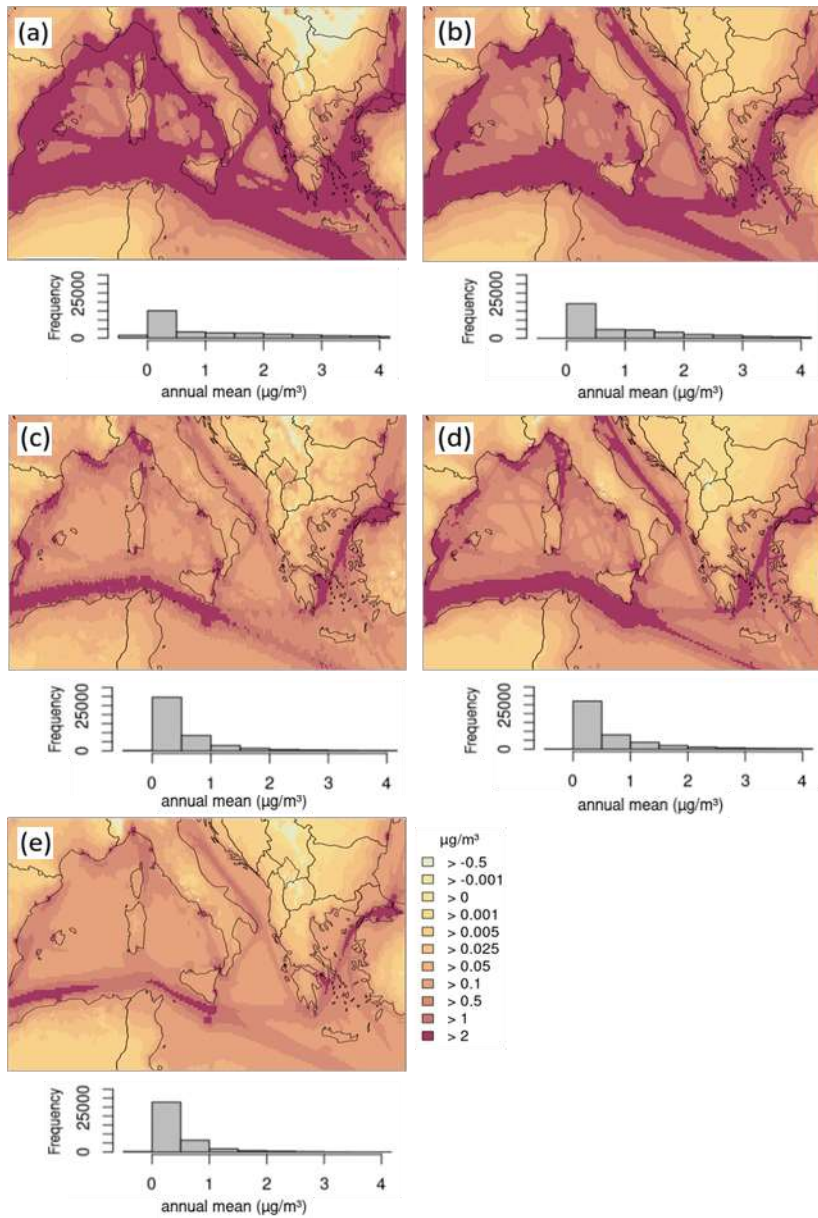

**Figure S16: Annual mean NO<sub>2</sub> absolute potential ship impact. (a) = CAMx, (b) = CHIMERE, (c) = CMAQ, (d) = EMEP, (e) = LOTOS-EUROS. Below the domain figure is the respective frequency distribution displayed for the annual mean SO<sub>2</sub> potential ship impact, referred to the whole model domain.**

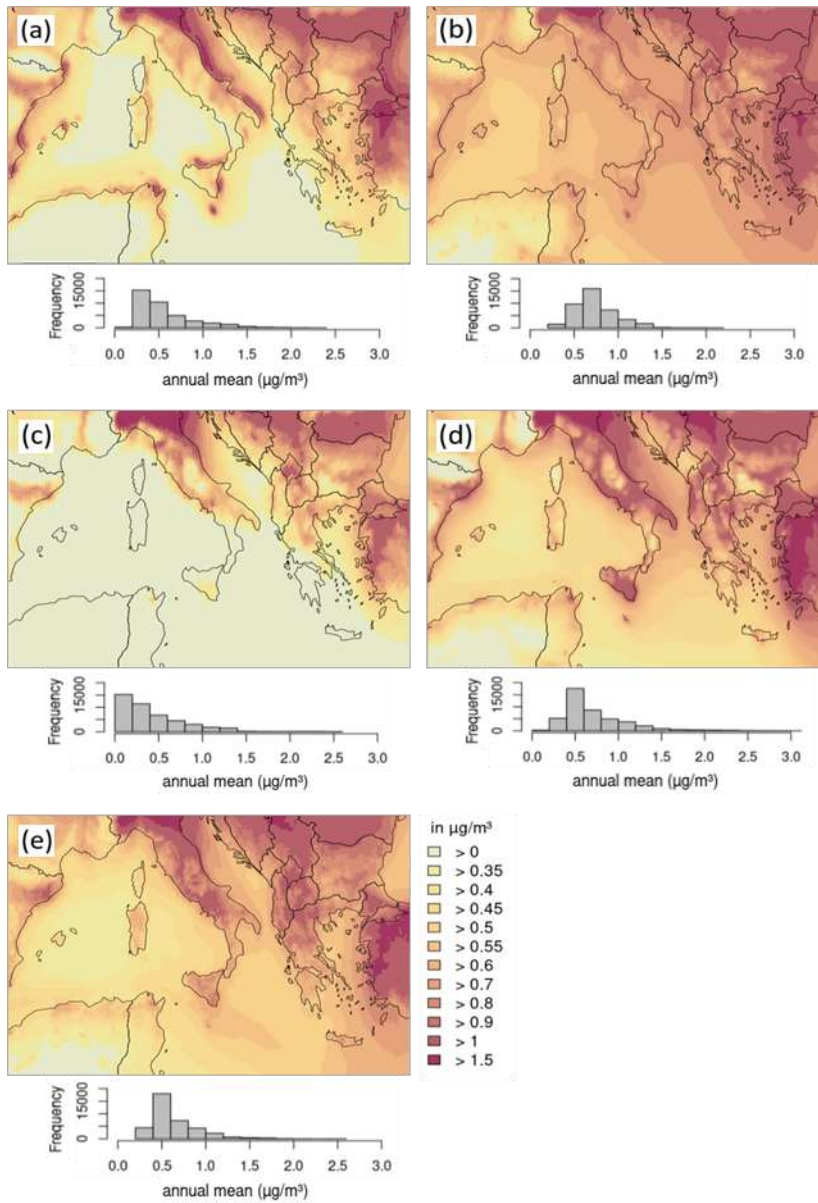

**Figure S17: Annual mean  $\text{NH}_4^+$  total concentration. (a) = CAMx, (b) = CHIMERE, (c) = CMAQ, (d) = EMEP, (e) = LOTOS-EUROS. Below the domain figure is the respective frequency distribution displayed for the annual mean  $\text{NH}_4$  concentration, referred to the whole model domain.**



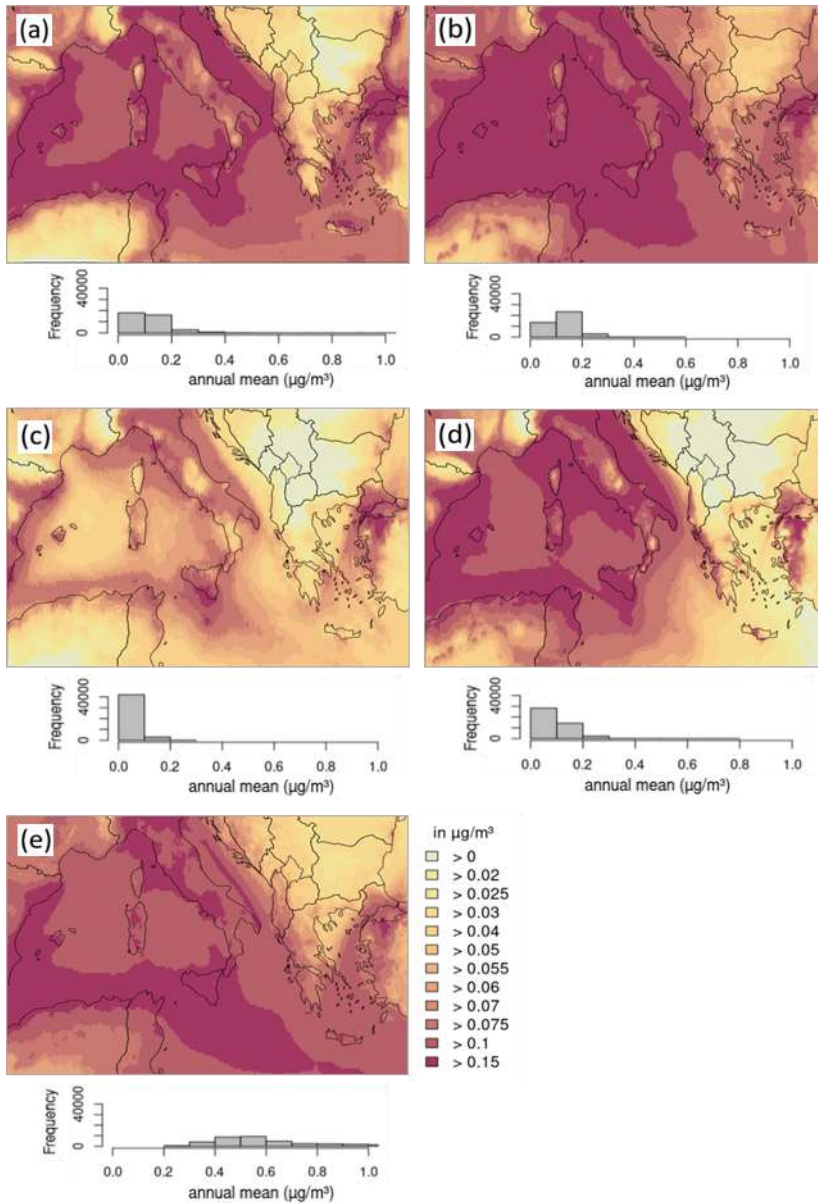

**Figure S18: Annual mean  $\text{NH}_4^+$  absolute potential ship impact. (a) = CAMx, (b) = CHIMERE, (c) = CMAQ, (d) = EMEP, (e) = LOTOS-EUROS. Below the domain figure is the respective frequency distribution displayed for the annual mean  $\text{NH}_4$  potential ship impact, referred to the whole model domain.**

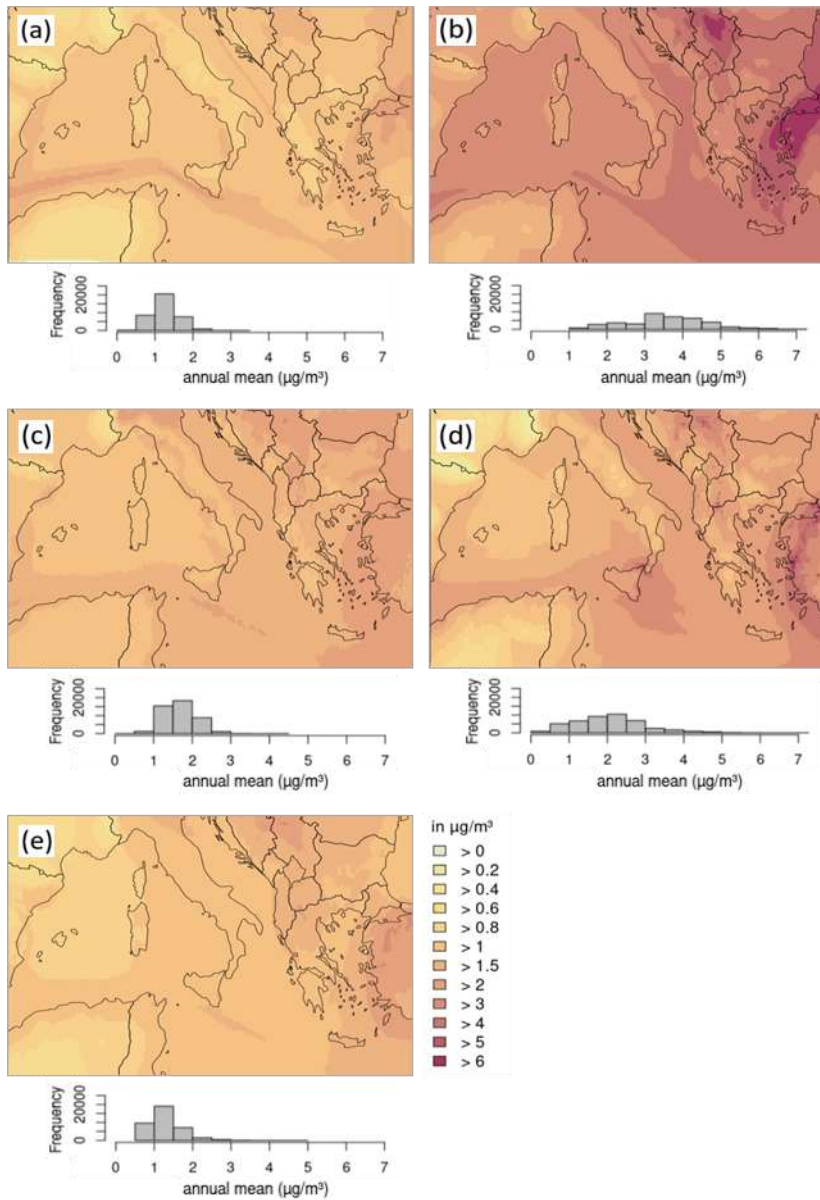

**Figure S19: Annual mean  $\text{SO}_4^{2-}$  total concentration. (a) = CAMx, (b) = CHIMERE, (c) = CMAQ, (d) = EMEP, (e) = LOTOS-EUROS. Below the domain figure is the respective frequency distribution displayed for the annual mean  $\text{SO}_4$  concentration, referred to the whole model domain.**



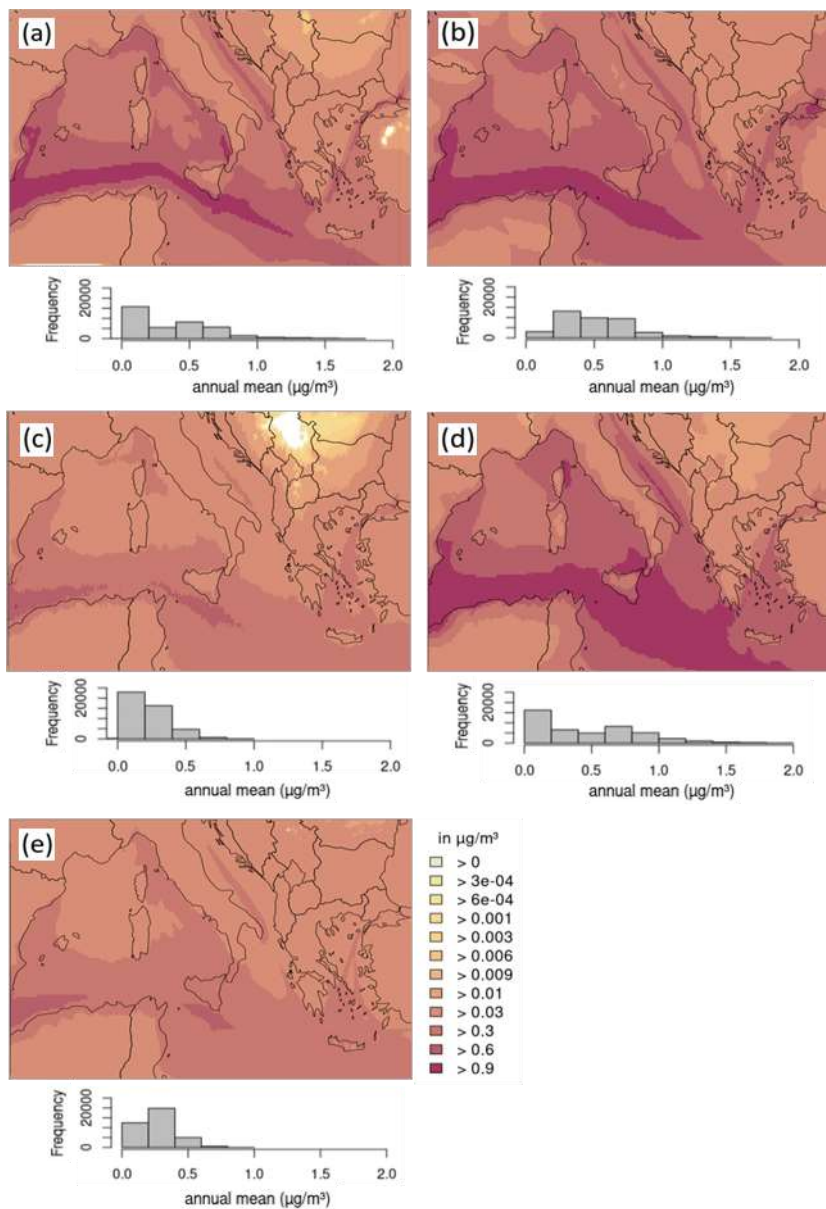

**Figure S20: Annual mean  $\text{SO}_4^{2-}$  absolute potential ship impact. (a) = CAMx, (b) = CHIMERE, (c) = CMAQ, (d) = EMEP, (e) = LOTOS-EUROS. Below the domain figure is the respective frequency distribution displayed for the annual mean  $\text{SO}_4$  potential ship impact, referred to the whole model domain.**

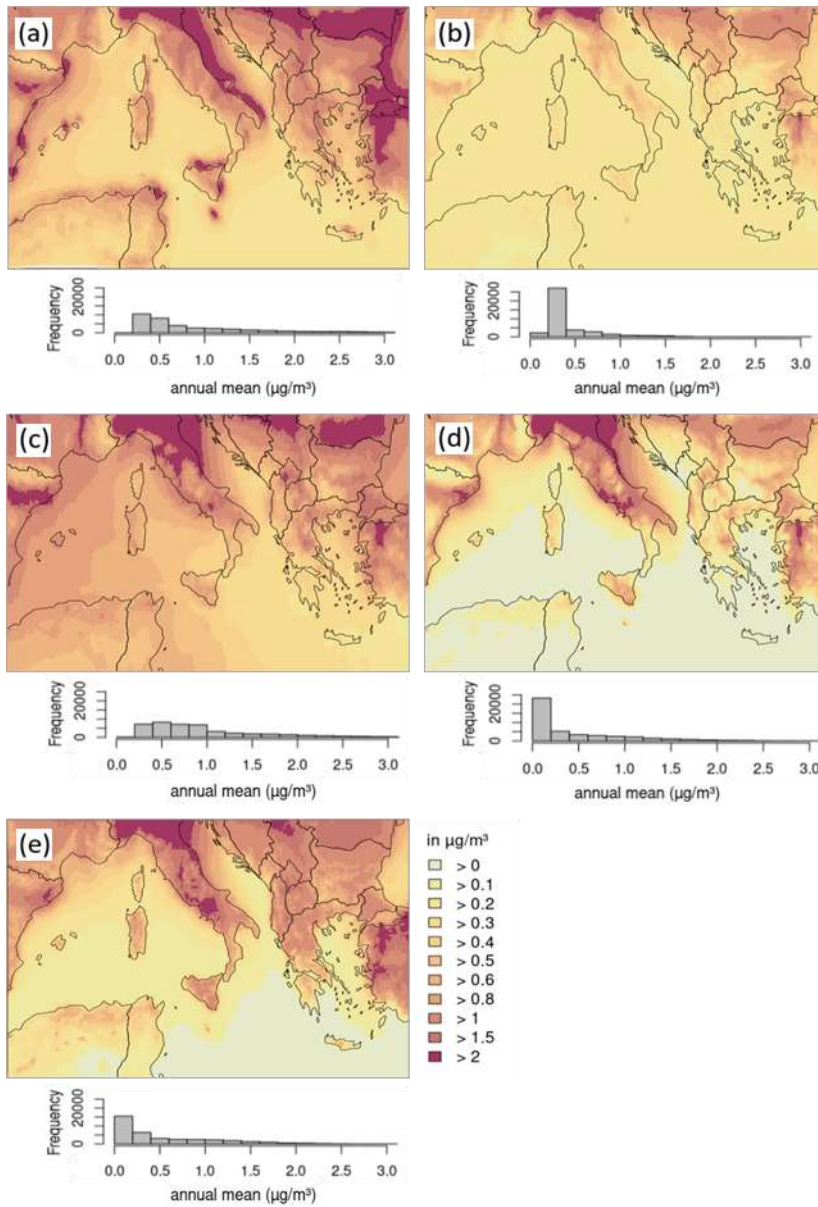

**Figure S21: Annual mean  $\text{NO}_3^-$  total concentration. (a) = CAMx, (b) = CHIMERE, (c) = CMAQ, (d) = EMEP, (e) = LOTOS-EUROS. Below the domain figure is the respective frequency distribution displayed for the annual mean  $\text{NO}_3^-$  concentration, referred to the whole model domain.**

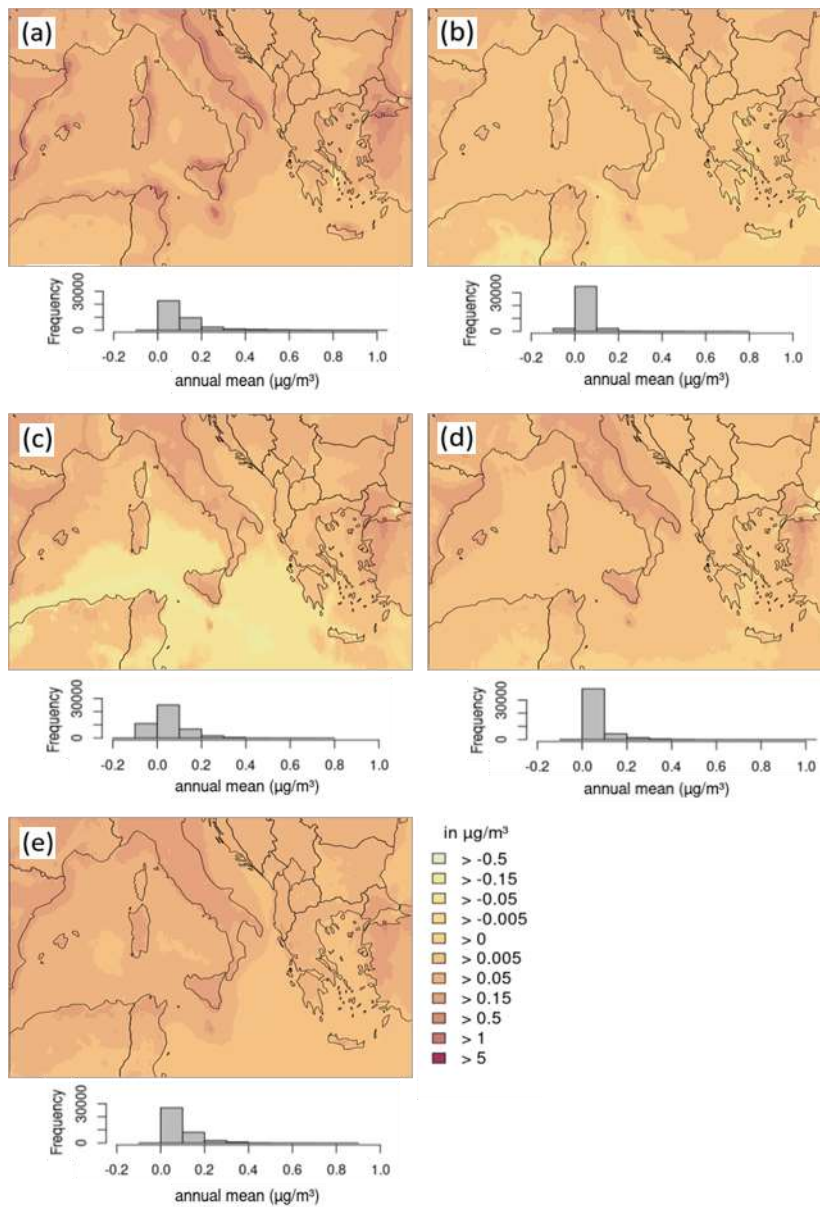

**Figure S22: Annual mean  $\text{NO}_3^-$  absolute potential ship impact. (a) = CAMx, (b) = CHIMERE, (c) = CMAQ, (d) = EMEP, (e) = LOTOS-EUROS. Below the domain figure is the respective frequency distribution displayed for the annual mean  $\text{NO}_3^-$  potential ship impact, referred to the whole model domain.**

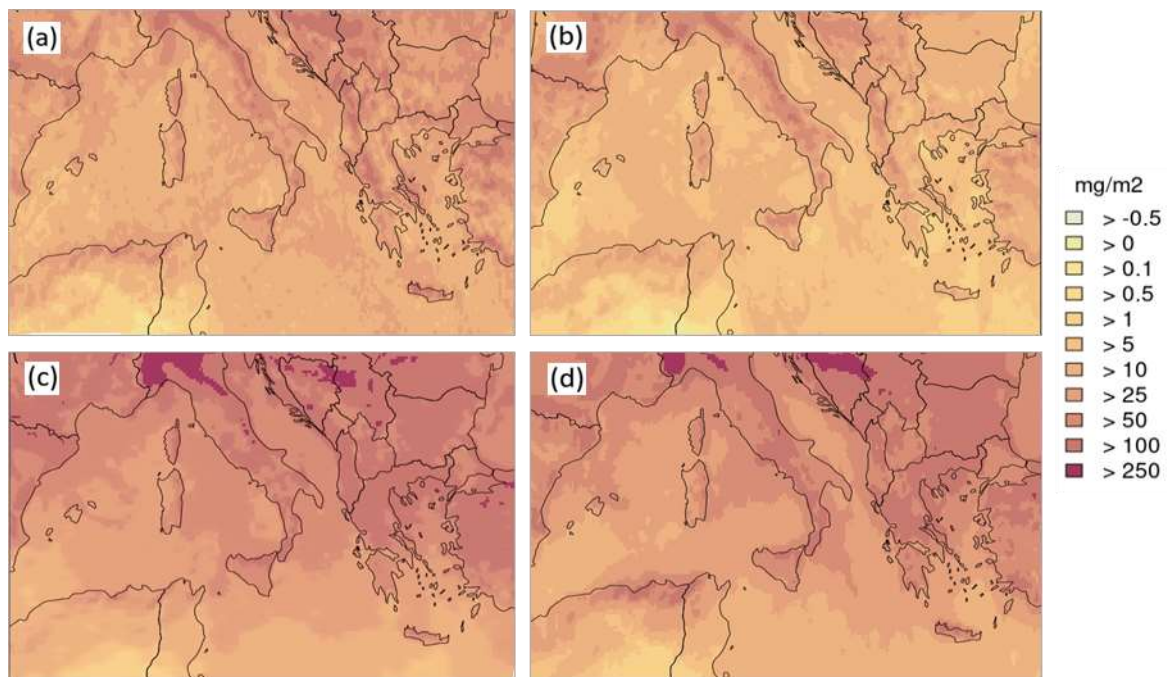

Figure S23:  $\text{NH}_4^+$  wet deposition annual sum. (a) = CAMx, (b) = CHIMERE, (c) = CMAQ, (d) = LOTOS-EUROS.



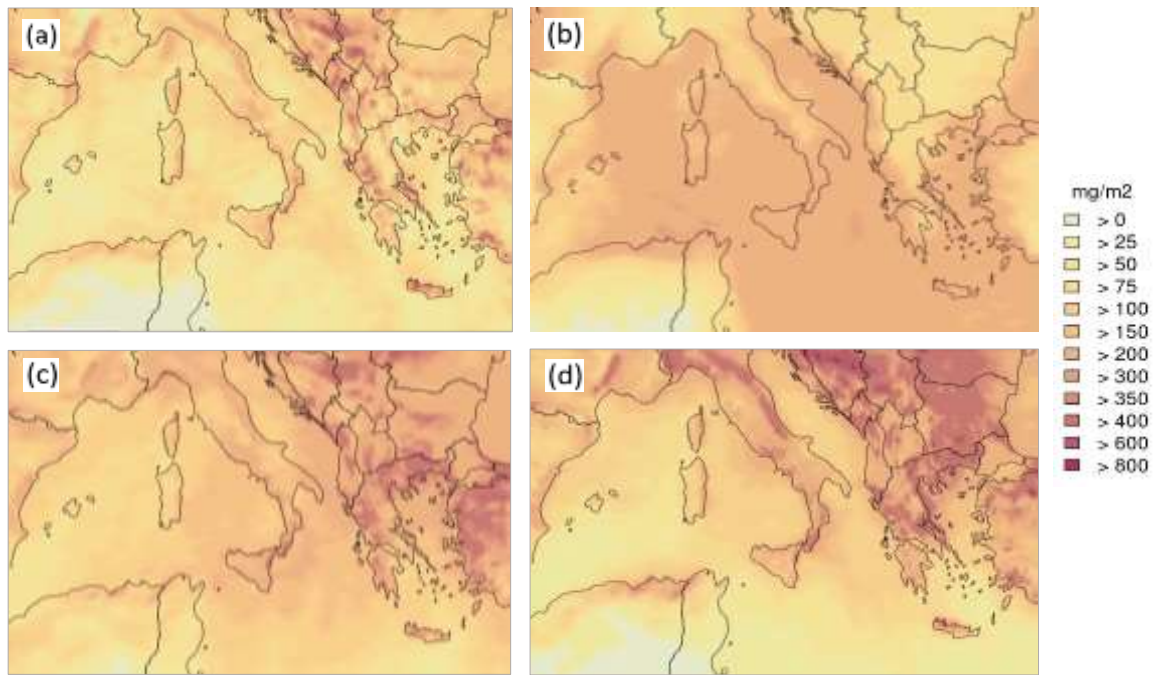

Figure S24:  $\text{SO}_4^{2-}$  wet deposition annual sum. (a) = CAMx, (b) = CHIMERE, (c) = CMAQ, (d) = LOTOS-EUROS.

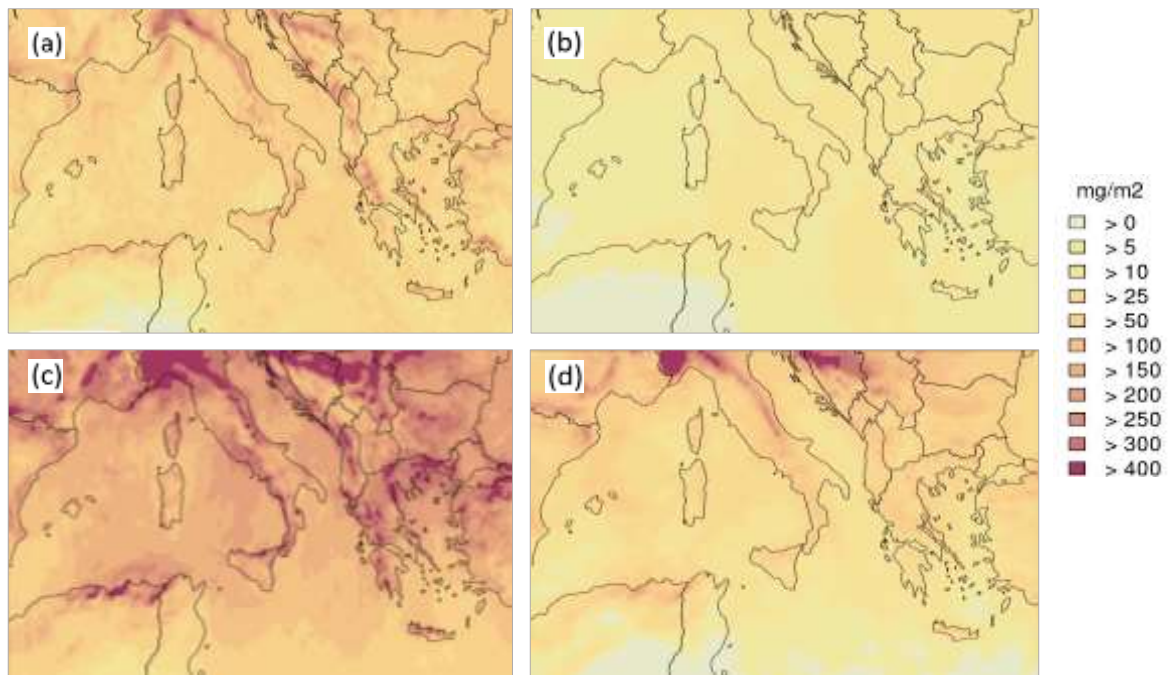

Figure S25: NO<sub>3</sub> wet deposition annual sum. (a) = CAMx, (b) = CHIMERE, (c) = CMAQ, (d) = LOTOS-EUROS.



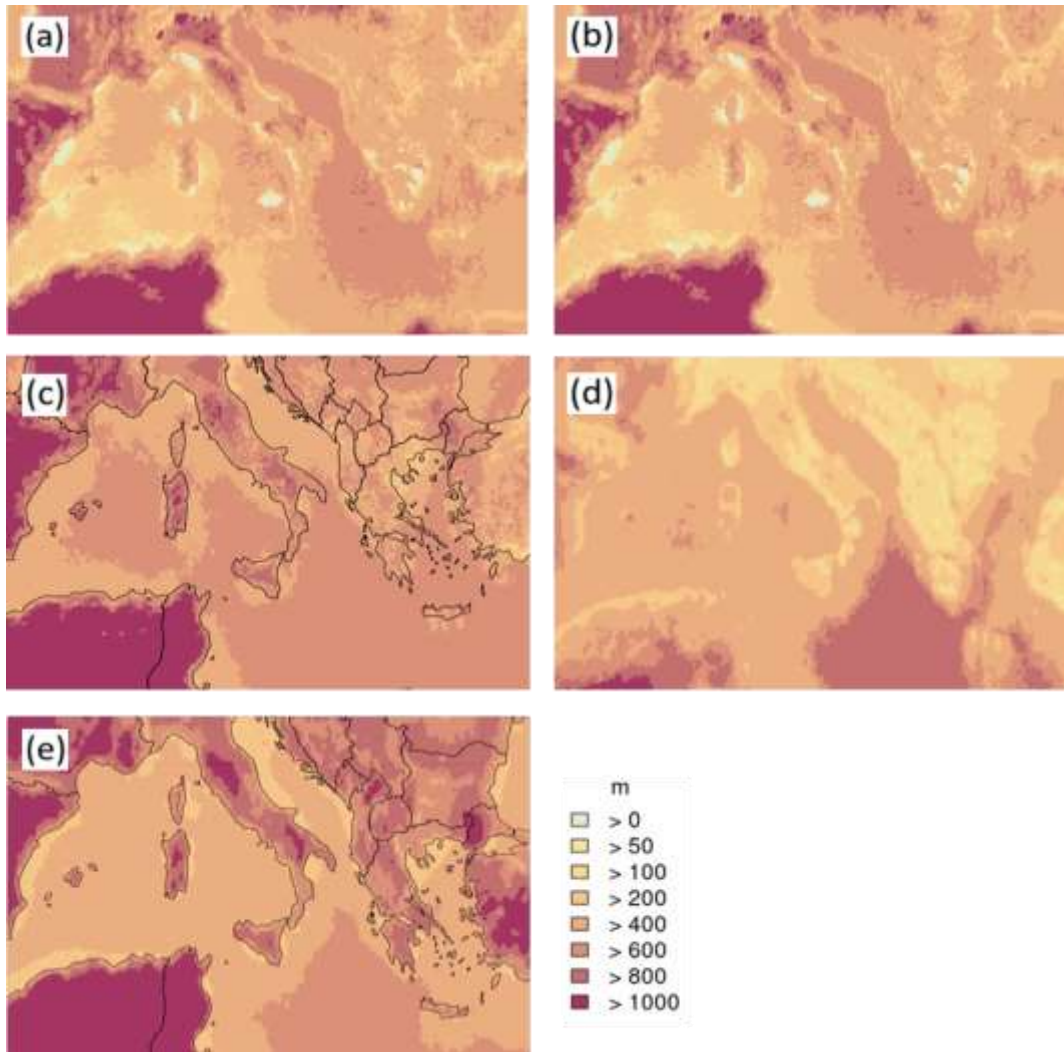

Figure S26: Median height of ABL at 4PM. (a) = CAMx, (b) = CHIMERE, (c) = CMAQ, (d) = EMEP, (e) = LOTOS-EUROS.

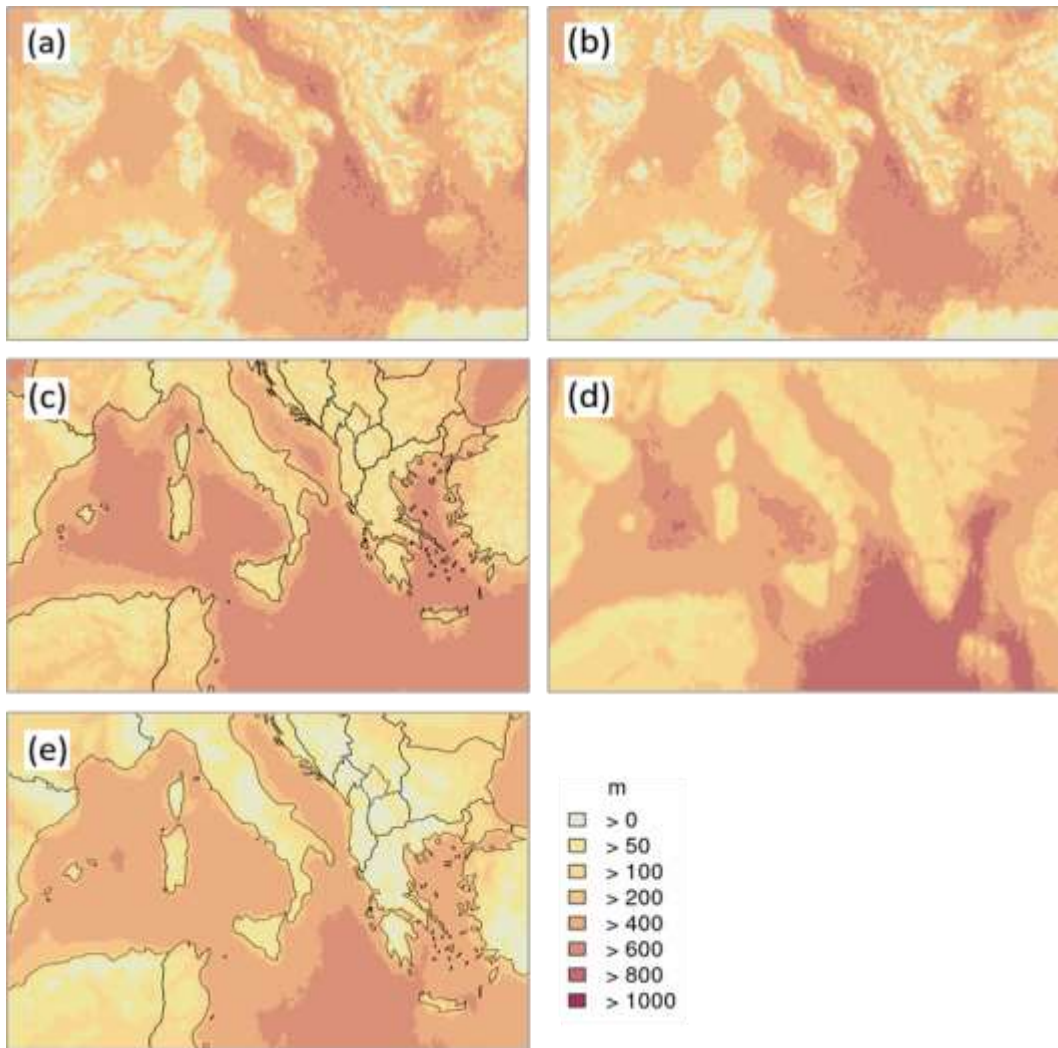

Figure S27: Median height of ABL at 4AM. (a) = CAMx, (b) = CHIMERE, (c) = CMAQ, (d) = EMEP, (e) = LOTOS-EUROS.

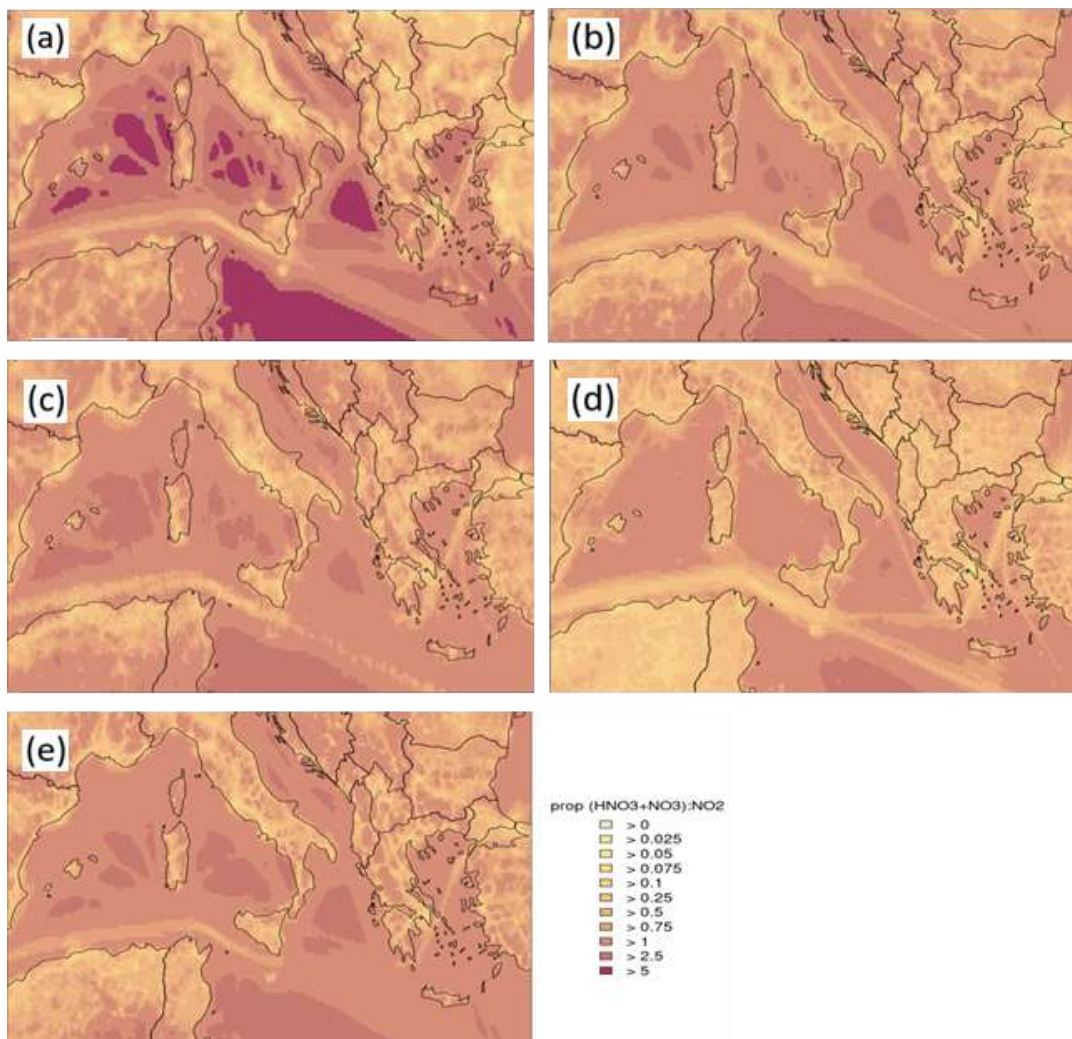

**Figure S28: Ratio  $(\text{HNO}_3 + \text{NO}_3) : \text{NO}_2$ . (a) = CAMx, (b) = CHIMERE, (c) = CMAQ, (d) = EMEP, (e) = LOTOS-EUROS.**

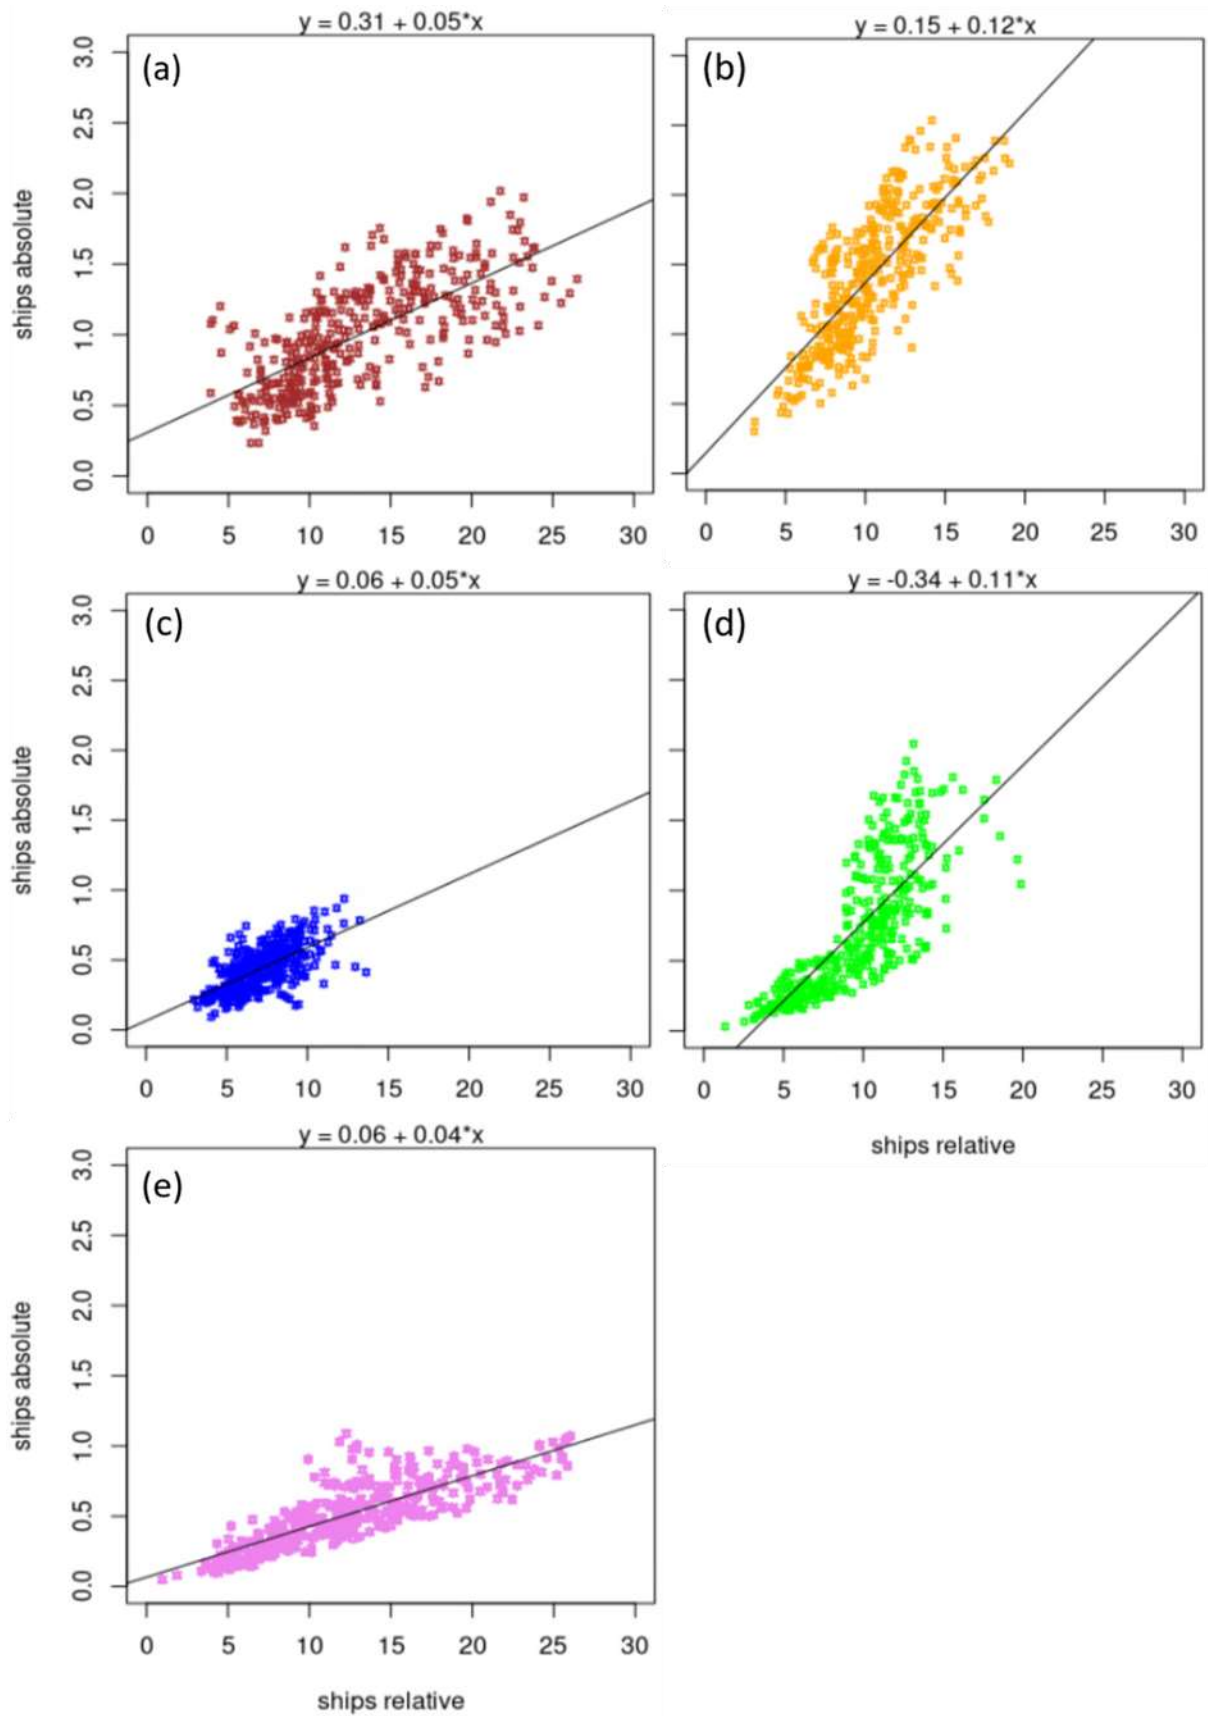

Figure S29: Relative ship impact plotted against absolute potential ship impact. (a) = CAMx, (b) = CHIMERE, (c) = CMAQ, (d) = EMEP, (e) = LOTOS-EUROS.



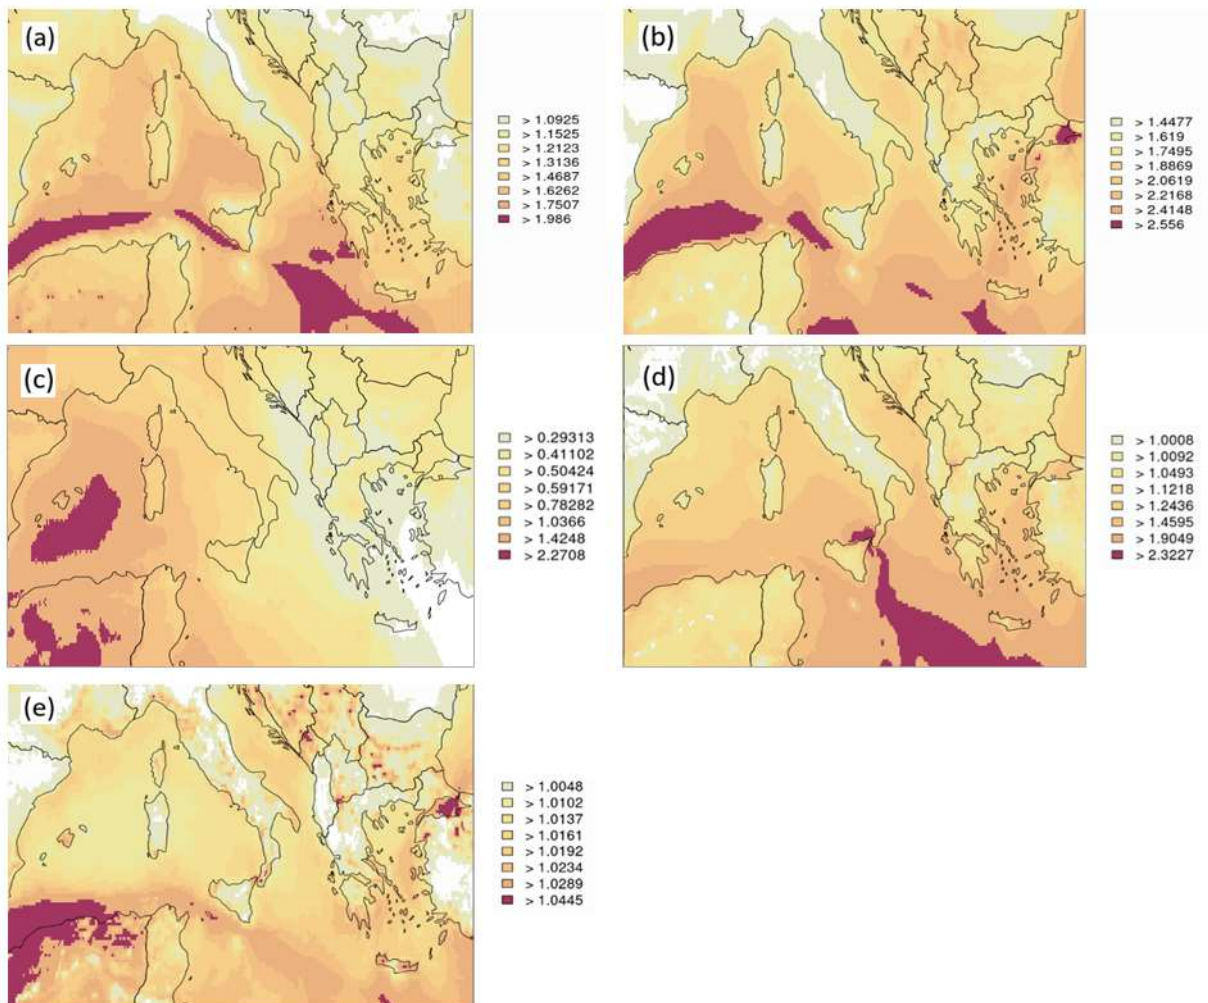

Figure S30: Maps display the ratio  $(2 \cdot \text{SO}_4^{2-} + \text{NO}_3^-) : \text{NH}_4^+$ ; calculated in mol. (a) = CAMx, (b) = CHIMERE, (c) = CMAQ, (d) = EMEP, (e) = LOTOS-EUROS.

(a)

No coarse  $\text{NO}_3$  in CAMx

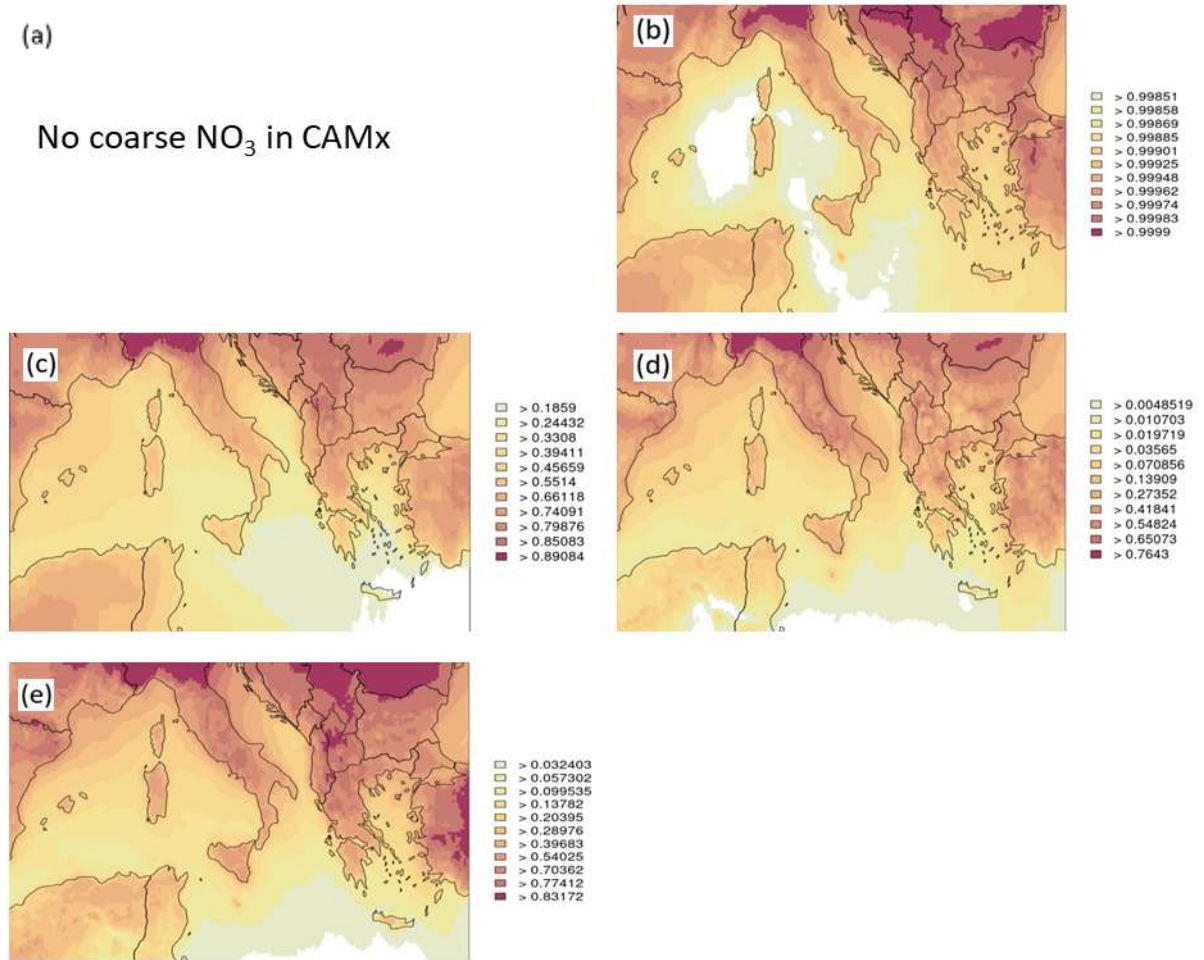

Figure S31: Maps display the ratio for the concentrations ( $\text{NO}_3^-$  fine):( $\text{NO}_3^-$  fine +  $\text{NO}_3^-$  coarse). (b) = CHIMERE, (c) = CMAQ, (d) = EMEP, (e) = LOTOS-EUROS.



(a)

No coarse  $\text{SO}_4$  in CAMx

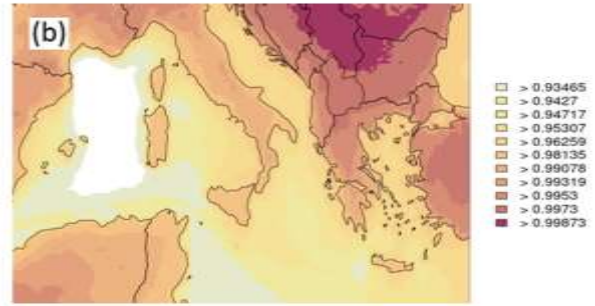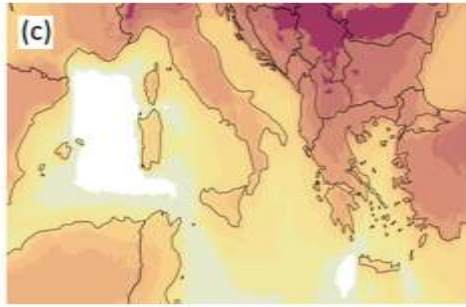

(d)

No coarse  $\text{SO}_4$  in EMEP

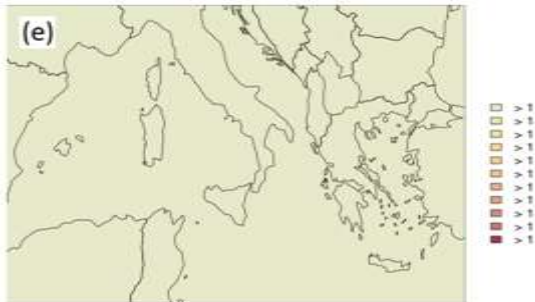

Figure S32: Maps display the ratio for the concentrations ( $\text{SO}_4^{2-}$  fine):( $\text{SO}_4^{2-}$  coarse). (b) = CHIMERE, (c) = CMAQ, (d) = EMEP, (e) = LOTOS-EUROS.
